# Supplementary material for: Evaluation of genetic alterations in hereditary cancer susceptibility genes in the Ashkenazi Jewish women community of Mexico
Source: PubMed Central journal article supplement (PMC9950094; doi:10.3389/fgene.2023.1094260), 2023-02-10

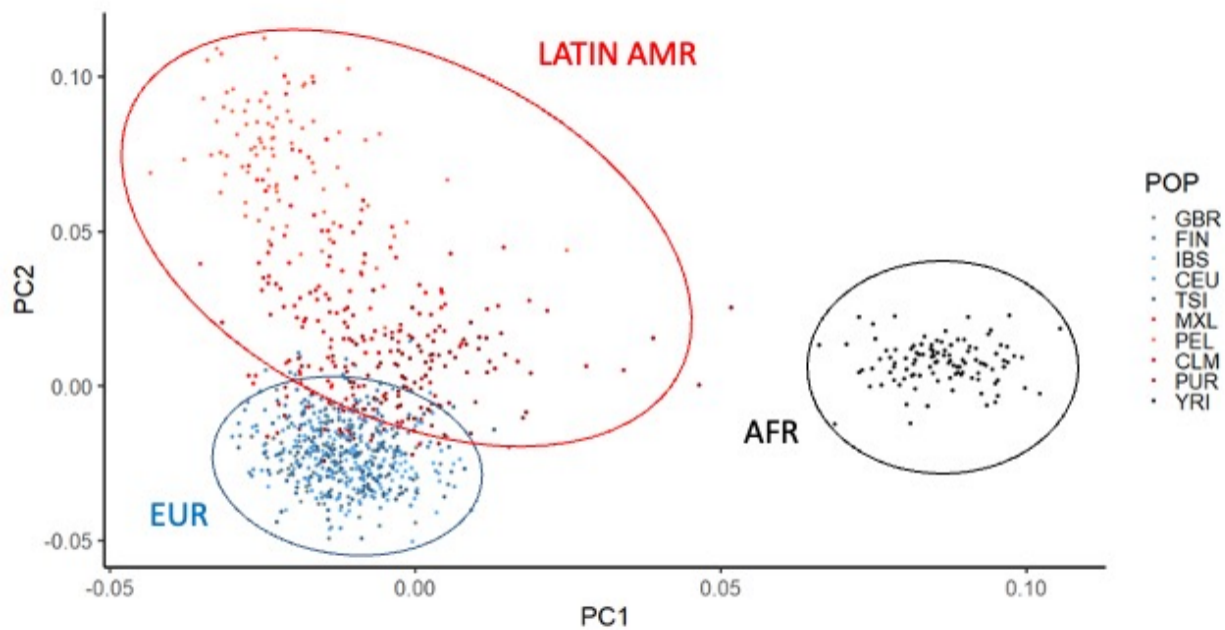

Supplement: Image1.pdf [file Image1.pdf]
